# Supplementary material
Source: PubMed Central journal article supplement (PMC2700926)
Supplement: 0900914106_0900914106SI.pdf [file 0900914106_0900914106SI.pdf]

# Supporting Information

Shroff et al. 10.1073/pnas.0900914106

## SI Text

### Details of Mass Spectrometry Measurements. Identification of ions.

The identities of ions were confirmed by accurate mass measurements, isotope distribution analysis, and, wherever possible, with collision-induced-dissociation (CID) studies. Accurate mass measurements were made by using external as well as internal calibration and further on lock-mass correction of the spectra based on the  $m/z$  values of the internal calibrants. The above mentioned criteria provided a mass accuracy of 0.02 Da in all cases. Further, for identification of metabolites from *Arabidopsis thaliana* leaf, each peak was queried against the KNapsAcK *A. thaliana* metabolomic database (<http://prime.p-sc.riken.jp/?action=metabolites.index>) accessible via TAIR—The *Arabidopsis* information resource: [www.arabidopsis.org/](http://www.arabidopsis.org/).

**Details of Density Functional Theory Calculations. Computational details.** All quantum chemical calculations were performed at the density functional theory (DFT) level. Geometry optimizations were carried out at the Perdew–Burke–Ernzerhof (PBE) level (1). The DFT/PBE calculations were expedited by expanding the

Coulomb integrals in an auxiliary basis set, the resolution-of-identity (RI-J) approximation (2, 3). The def2-SVP basis set was used on all atoms (4, 5). Accurate single-point energies were then calculated by using the B3LYP method (6–8) as implemented in Turbomole 5.8 (9). For these calculations, the def2-TZVP basis set was used on all atoms (4). For the reference reactions in solvent, the coupled cluster (CC2) method was used using aug-cc-pVDZ (10) and aug-cc-VTZ (11) basis sets. To allow for solvation effects, the conductor-like screening model (COSMO) method (12, 13), was used with the dielectric constant corresponding to ethanol ( $\epsilon_r = 24.55$ ). The Gibbs free energy was then calculated as the sum of the following contributions:

$$G = E_{el} + G_{\text{solv}} + E_{\text{ZPE}} - RT \ln(q_{\text{trans}} q_{\text{rot}} q_{\text{vib}}), \quad [\text{s1}]$$

where  $E_{el}$  is the in vacuo energy of the system,  $G_{\text{solv}}$  is the solvation free energy,  $E_{\text{ZPE}}$  is the zero-point energy, and  $-RT \ln(q_{\text{trans}} q_{\text{rot}} q_{\text{vib}})$  accounts for the entropic terms and the thermal correction to the enthalpy obtained from a frequency calculation at 298 K and 1 atm using the ideal-gas approximation (14).

1. Perdew JP, Burke K, Ernzerhof M (1996) Generalized gradient approximation for the exchange-correlation hole of a many-electron system. *Phys Rev Lett* 77:3865–3868.
2. Eichkorn K, Treutler O, Öhm H, Häser M, Ahlrichs R (1995) Auxiliary basis-sets to approximate Coulomb potentials. *Chem Phys Lett* 240:283–290.
3. Eichkorn K, Weigen F, Treutler O, Ahlrichs R (1997) Auxiliary basis sets for main row atoms and transition metals and their use to approximate Coulomb potentials. *Theor Chim Acta* 97:119–124.
4. Weigend F, Ahlrichs R (2005) Balanced basis sets of split valence, triple zeta valence and quadruple zeta valence quality for H to Rn: Design and assessment of accuracy. *Phys Chem Chem Phys* 7:3297–3305.
5. Schäfer A, Huber C, Ahlrichs R (1994) Fully optimized contracted Gaussian-basis sets of triple zeta valence quality for atoms Li to Kr. *J Chem Phys* 100:5829–5835.
6. Becke AD (1988) Density-functional exchange-energy approximation with correct asymptotic-behavior. *Phys Rev A* 38:3098–3100.
7. Becke AD (1993) Density-functional thermochemistry: 3. The role of exact exchange. *J Chem Phys* 98:5648–5652.
8. Stephens PJ, Devlin FJ, Frisch MJ, Chabalowski CF (1994) Ab-initio calculations of vibrational absorption and circular-dichroism spectra using density-functional force-fields. *J Phys Chem* 98:11623–11627.
9. Hertwig RH, Koch W (1997) On the parameterization of the local correlation functional. What is Becke-3-LYP? *Chem Phys Lett* 268:345–351.
10. Woon DE, Dunning TH (1993) Gaussian-basis sets for use in correlated molecular calculations. 3. The atoms aluminium through argon. *J Chem Phys* 98:1358–1371.
11. Kendall RA, Dunning TH, Harrison RJ (1992) Electron-affinities of the 1st-row atoms revisited—Systematic basis-sets and wave-functions. *J Chem Phys* 96:6796–6806.
12. Klamt A, Schuurmann G (1993) COSMO—A new approach to dielectric screening in solvents with explicit expressions for the screening energy and its gradient. *J Chem Soc Perkin Trans* 2:799–805.
13. Schäfer A, Klamt A, Sattel D, Lohrenz JCW, Eckert F (2000) COSMO Implementation in TURBOMOLE: Extension of an efficient quantum chemical code towards liquid systems. *Phys Chem Chem Phys* 2:2187–2193.
14. Jensen F (1999) *Introduction to Computational Chemistry* (Wiley, New York).

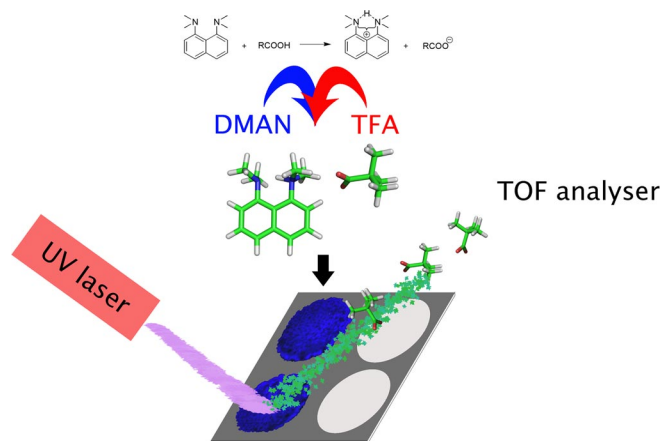

**Fig. S1.** Schematic illustration of the principle of matrix-assisted ionization/laser desorption (MAILD) mass spectrometry; interaction between DMAN and the acidic analytes, e.g., DMAN+H<sup>+</sup>CF<sub>3</sub>COO<sup>-</sup> salt; its minimum energy structure calculated by DFT, corresponding to the X-ray determined structure, is shown.



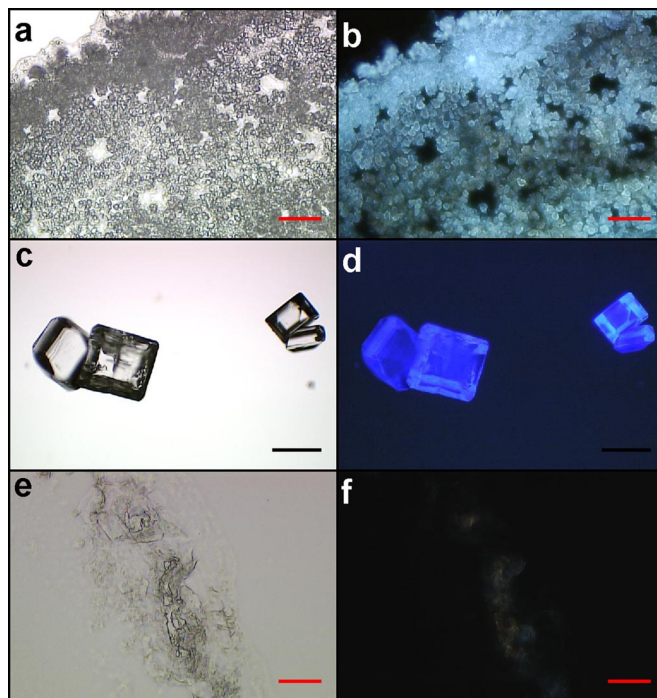

**Fig. S3.** (a, c, and e) Optical images for DMAN crystals (a), crystals obtained after mixing DMAN and TFA (c), and crystals obtained after mixing DMAN and SA (e). (b, d, and f) Fluorescence images for DMAN crystals (b), crystals obtained after mixing DMAN and TFA (d), and crystals obtained after mixing DMAN and SA (f). (Red scale bar, 25  $\mu\text{m}$ ; black scale bar, 310  $\mu\text{m}$ .)

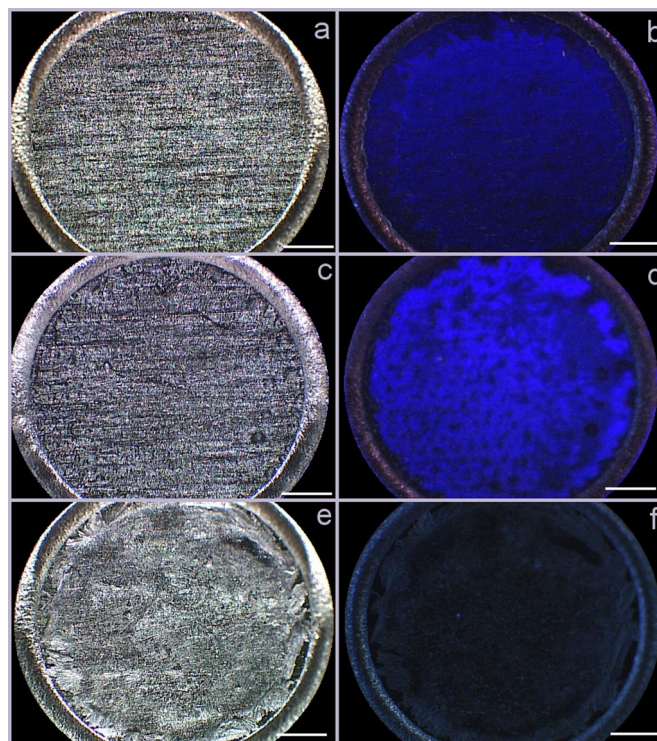

**Fig. S4.** Images showing the surface coverage of DMAN and DMAN with analytes on a MALDI metallic plate. (*a*, *c*, and *e*) The optical images of DMAN (*a*), DMAN + TFA (*c*), and DMAN + SA (*e*). (*b*, *d*, and *f*) The fluorescent images of DMAN (*b*), DMAN + TFA (*d*), and DMAN + SA (*f*).

**Table S1. Comparison of the list of metabolites (fatty acids, FA) identified from 2:1 CHCl<sub>3</sub>:CH<sub>3</sub>OH extracts of 7 *Drosophila melanogaster* males through MAILD-TOF/MS (untreated as FA) and GC-MS as FA methyl esters (FAME) prepared by diazomethane treatment**

| FA* identified through MALDI-MS                                                                                                                                                          | Analytes identified through GC-MS                    |
|------------------------------------------------------------------------------------------------------------------------------------------------------------------------------------------|------------------------------------------------------|
| 12:0, 14:0, 14:1, 16:0, 16:1, 17:2, 18:0, 18:1, 18:2, 18:3, 19:0, 19:2, 19:3, 20:1, 20:2, 20:3, 21:0, 21:1, 21:2, 22:3, 22:0, 22:1, 23:0, 23:2, 24:0, 25:0, 29:6, 30:5, 33:2, 33:4, 39:4 | 12:0, 14:0, 14:1, 15:0, 15:1, 16:0, 16:1, 18:0, 18:1 |

The same number of metabolites could be identified by using MAILD-TOF/MS even from a single fly; however, in the case of a single fly extract, GC-MS sensitivity was insufficient to allow for the observation of any metabolites.

\*The numbers before colons refer to the number of carbons and those after the colons refer to the number of double bonds; 18:1 is oleic acid.

**Table S2. The calculated proton affinities ( $\Delta G_{\text{pa}}$ ) and Gibbs energies of deprotonation ( $\Delta G_{\text{deprot}}$ ) of neutral species in gas phase and in solvent (ethanol)**

|                          | Gas phase              |                            |                        | Solvent (ethanol)      |                            |                        |
|--------------------------|------------------------|----------------------------|------------------------|------------------------|----------------------------|------------------------|
|                          | $\Delta G_{\text{pa}}$ | $\Delta G_{\text{deprot}}$ | $\Delta G_{\text{pa}}$ | $\text{p}K_{\text{a}}$ | $\Delta G_{\text{deprot}}$ | $\text{p}K_{\text{a}}$ |
| Aniline                  | 210.0                  | 368.3                      | 267.8                  | 3.3                    | 318.5                      | 40.4                   |
| DAN                      | 224.9                  | 352.8                      | 269.7                  | 4.6                    | 310.3                      | 34.3                   |
| DMA                      | 222.2                  | 398.5                      | 270.1                  | 4.9                    | 347.4                      | 61.5                   |
| DMAN                     | 245.3                  | 393.0                      | 282.5                  | 13.6                   | 351.5                      | 64.6                   |
| DMAN-Ac                  | n/a                    | 353.1                      | n/a                    | n/a                    | 311.4                      | 35.2                   |
| Naptho-SO <sub>3</sub> H | 194.5                  | 313.9                      | 236.0                  | -20.5                  | 266.5                      | 2.3                    |

The values are in kcal.mol<sup>-1</sup> or in dimensionless  $\text{p}K_{\text{a}}$  scale ( $\text{p}K_{\text{a}}$ ). The free energy of proton solvation in methanol was used ( $\Delta G_{\text{solv}}(\text{H}^+) = 263.4 \text{ kcal.mol}^{-1}$ ) for the  $\text{p}K_{\text{a}}$  scale<sup>24</sup>. DAN represents 1,8-diaminonaphthalene, DMA *N,N*-dimethylaniline, DMAN 1,8-bis(dimethylamino)naphthalene, and DMAN-Ac corresponds to the salt of DMAN with acetic acid used as a simple model for preliminary calculations. n/a, not applicable.

**Table S3. The calculated Gibbs free energies of salt formation in ethanol ( $AH...B \rightarrow A^-...BH^+$  reaction),  $\Delta G_{\text{salt-form}}$ , and the total Gibbs free energy of ionization,  $\Delta G_{\text{ion}}$**

| Complex with                          | $\Delta G_{\text{salt-form}}$ (ethanol) | $\Delta G_{\text{ion}}$   |
|---------------------------------------|-----------------------------------------|---------------------------|
|                                       | [kcal·mol <sup>-1</sup> ]               | [kcal·mol <sup>-1</sup> ] |
| DMAN                                  |                                         |                           |
| CF <sub>3</sub> COOH                  | -3.7                                    | -86.8                     |
| CCl <sub>3</sub> COOH                 | -2.8                                    | -84.7                     |
| C(CH <sub>3</sub> ) <sub>3</sub> COOH | 1.9                                     | -94.9                     |
| CH <sub>3</sub> COOH                  | 2.2                                     | -98.3                     |

The  $\Delta G_{\text{ion}}$  corresponds to the overall process of ionization, i.e.,  $AH...B(aq) \rightarrow A^-(g) + BH^+(g)$  or  $A^-...BH^+(aq) \rightarrow A^-(g) + BH^+(g)$  (when the zwitterionic form is more stable in solution) processes. DMAN represents 1,8-bis(dimethylamino)naphthalene.



Table S4. Crystal data and structure refinement for 1,8-bis(dimethylamino)naphthalene trifluoroacetate (fo3376)

|                                         |                                                                              |                                                    |
|-----------------------------------------|------------------------------------------------------------------------------|----------------------------------------------------|
| Identification code                     | FO3376                                                                       |                                                    |
| Empirical formula                       | C <sub>16</sub> H <sub>19</sub> F <sub>3</sub> N <sub>2</sub> O <sub>2</sub> |                                                    |
| Formula weight                          | 328.33                                                                       |                                                    |
| Temperature                             | 183(2) K                                                                     |                                                    |
| Wavelength                              | 0.71073 Å                                                                    |                                                    |
| Crystal system                          | Orthorhombic                                                                 |                                                    |
| Space group                             | Pnma                                                                         |                                                    |
| Unit cell dimensions                    | $a = 6.9877(4)$ Å<br>$b = 12.4040(7)$ Å<br>$c = 19.1110(7)$ Å                | $a = 90^\circ$<br>$b = 90^\circ$<br>$g = 90^\circ$ |
| Volume                                  | 1656.45(15) Å <sup>3</sup>                                                   |                                                    |
| Z                                       | 4                                                                            |                                                    |
| Density (calculated)                    | 1.317 Mg/m <sup>3</sup>                                                      |                                                    |
| Absorption coefficient                  | 0.110 mm <sup>-1</sup>                                                       |                                                    |
| F(000)                                  | 688                                                                          |                                                    |
| Crystal size                            | 0.05 × 0.05 × 0.04 mm <sup>3</sup>                                           |                                                    |
| $\theta$ -range for data collection     | 3.10 to 27.49°.                                                              |                                                    |
| Index ranges                            | $-8 \leq h \leq 9$ , $-13 \leq k \leq 16$ , $-23 \leq l \leq 24$             |                                                    |
| Reflections collected                   | 10,666                                                                       |                                                    |
| Independent reflections                 | 1,974 [ $R(\text{int}) = 0.0665$ ]                                           |                                                    |
| Completeness to $\theta = 27.49^\circ$  | 99.5%                                                                        |                                                    |
| Absorption correction                   | None                                                                         |                                                    |
| Refinement method                       | Full-matrix least-squares on $F^2$                                           |                                                    |
| Data/restraint /parameters              | 1,974/0/115                                                                  |                                                    |
| Goodness-of-fit on $F^2$                | 1.063                                                                        |                                                    |
| Final $R$ indices [ $I > 2 \sigma(I)$ ] | $R1 = 0.1081$ , $wR2 = 0.3082$                                               |                                                    |
| $R$ indices (all data)                  | $R1 = 0.1504$ , $wR2 = 0.3503$                                               |                                                    |
| Extinction coefficient                  | 0.019(8)                                                                     |                                                    |
| Largest diff. peak and hole             | 1.135 and $-0.915$ e <sup>-</sup> Å <sup>-3</sup>                            |                                                    |

Table S5. Atomic coordinates ( $\times 10^4$ ) and equivalent isotropic displacement parameters ( $\text{\AA}^2 \times 10^3$ ) for fo3376

| Atom(No) | x        | y        | z       | U(eq)  |
|----------|----------|----------|---------|--------|
| N(1)     | 7311(4)  | 6468(2)  | 575(2)  | 26(1)  |
| C(1)     | 8850(5)  | 6474(3)  | 1089(2) | 24(1)  |
| C(2)     | 9552(7)  | 7500     | 1321(2) | 22(1)  |
| C(3)     | 11050(7) | 7500     | 1833(2) | 26(1)  |
| C(4)     | 11745(5) | 6503(3)  | 2081(2) | 32(1)  |
| C(5)     | 11041(6) | 5547(3)  | 1854(2) | 34(1)  |
| C(6)     | 9560(5)  | 5531(3)  | 1350(2) | 29(1)  |
| C(7)     | 5514(6)  | 5992(4)  | 859(2)  | 40(1)  |
| C(8)     | 7879(6)  | 5971(3)  | -100(2) | 38(1)  |
| O(1)     | 7334(6)  | 1604(3)  | 565(2)  | 64(1)  |
| C(9)     | 7143(9)  | 2500     | 823(3)  | 38(1)  |
| C(10)    | 6480(20) | 2500     | 1563(4) | 87(4)  |
| F(1)     | 6073(15) | 1614(6)  | 1870(4) | 84(2)  |
| F(2)     | 4570(19) | 2022(10) | 1598(6) | 142(4) |
| F(3)     | 7264(14) | 1748(7)  | 1983(4) | 85(2)  |

$U(\text{eq})$  is defined as one third of the trace of the orthogonalized  $U^{ij}$  tensor.
